# Supplementary material for: Ethanol extract of Gynura bicolor (GB) protects against UVB-induced photodamage of skin by inhibiting P53-mediated Bcl-2/BAX/Caspase-3 apoptosis pathway
Source: Springer Nature journal article supplement (doi:10.1007/s00403-019-01977-y), 2019-09-19
Supplement: MOESM1 [file 17189734]

| primer sequences | |
| --- | --- |
| GAPDH | Forward 5’-TCATCAATGGAAATCCCTCACC-3’;  Reverse 5’-TGGACTCCACGACGTACTCAGC-3’ |
| Caspase-3 | Forward 5’-TTTGTTTGTGTGCTTCTGAGCC-3’  Reverse 5’-GATGTTCTGGAGAGCCCCG-3’ |
| P53 | Forward 5’-CGCTTCGAGATGTTCCGAGA-3’  Reverse 5’-CTTCAGGTGGCTGGAGTGAG-3’ |
| Bax | Forward 5’-TCATGGGCTGGACATTGGAC-3’  Reverse 5’-GCGTCCCAAAGTAGGAGAGG-3’ |
| Bcl-2 | Forward 5’-AGGATTGTGGCCTTCTTTGA-3’  Reverse 5’-CCGGTTCAGGTACTCAGTCA-3’ |
| GAPDH | Forward 5’-GGAGAGTGTTTCCTCGTCCC-3,  Reverse 5’-ACTGTGCCGTTGAATTTGCC-3’ |

Supplementary table 1: The sequences of the primers of Caspase-3,P53,Bax,Bcl-2,GAPDH
